# Supplementary material for: Temporal shifts in ground vegetation characteristics on newly constructed forest road verges
Source: Research Square preprint supplement (doi:10.21203/rs.3.rs-8555061/v1), 2026-02-01
Supplement: Supplementary file 1 [file 915e03ebb2a6136901079508.xlsx]

## Sheet: Sheet2
Temporal shifts in ground vegetation characteristics on newly constructed forest road verges, journal: Folia Geobotanica Līga Pentjuša, Linda Gerra-Inohosa, Ilze Matisone, Zane Lībiete L. Pentjusa*, L. Gerra-Inohosa, I. Matisone, Z. Lībiete Latvian State Forest Research Institute “Silava”, Rigas street 111, Salaspils 2169, Latvia *e-mail: liga.pentjusa@silava.lv
Appendix II. Strength (χ² value, F value), effect size (conditional R², marginal R²), variance of random effects, and significance (p-value) of the effect of road age on taxonomic richness (GLM results) and the Shannon diversity index, evenness, Ellenberg indicators and their Rao's quadratic entropy (light (L), moisture (M), reaction (R), nutrients (N)), soil disturbance and its Rao’s quadratic e…
	Taxonomic richness				The Shannon diversity index				Evenness				Ellenberg L				Ellenberg M				Ellenberg R				Ellenberg N				Soil disturbance				RaoQ Ellenberg L				RaoQ Ellenberg M				RaoQ Ellenberg R				RaoQ Ellenberg N				RaoQ soil disturbance
	ChiSquare (χ²)	p-value	emmean ± se	group	F value	p-value	emmean ± se	group	F value	p-value	emmean ± se	group	F value	p-value	emmean ± se	group	F value	p-value	emmean ± se	group	F value	p-value	emmean ± se	group	F value	p-value	emmean ± se	group	F value	p-value	emmean ± se	group	F value	p-value	emmean ± se	group	F value	p-value	emmean ± se	group	F value	p-value	emmean ± se	group	F value	p-value	emmean ± se	group	F value
Road age	950.25	< 2.2E-16			142.15	< 2.2E-16			15.513	1.51e-13			62.5	< 2.2E-16			10.387	3.42e-09			12.709	3.4-E11			13.185	1.34-E11			15.35	2.047e-13			5.7559	4.359e-05			15	4.018e-13			11.732	2.336e-10			44.284	< 2.2E-16			23.297
1 year			10.9 ± 1.29	a			2.2 ± 0.17	a			0.975 ± 0.58	b			6.23 ± 0.16	a			4.87 ± 0.162	a			4.30 ± 0.304	a			3.80 ± 0.334	a			0.245 ± 0.034	a			0.0615 ± 0.00517	ab			0.0505 ± 0.00716	a			0.0931 ± 0.00392	a			0.0821 ± 0.00314	a
2 years			26.5 ± 3.04	b			3.13 ± 0.17	b			0.975 ± 0.58	b			6.82 ± 0.16	b			5.11 ± 0.162	bc			4.7 ± 0.304	b			4.39 ± 0.334	c			0.300 ± 0.034	c			0.0692 ± 0.00517	b			0.0691 ± 0.00716	b			0.1049 ± 0.00392	bc			0.1338 ± 0.00314	b
3 years			24.3 ± 2.8	b			3.04 ± 0.17	b			0.961 ± 0.58	a			7.04 ± 0.16	c			5.03 ± 0.162	b			4.74 ± 0.304	b			4.52 ± 0.334	c			0.275 ± 0.034	bc			0.0553 ± 0.00517	a			0.0641 ± 0.00716	b			0.1031 ± 0.00392	b			0.1262 ± 0.00314	b
4 years			33.5 ± 3.83	c			3.35 ± 0.17	c			0.955 ± 0.58	a			6.96 ± 0.16	bc			5.15 ± 0.162	bc			4.73 ± 0.304	b			4.32 ± 0.334	bc			0.257 ± 0.034	ab			0.0581 ± 0.00517	a			0.0687 ± 0.00716	b			0.1061 ± 0.00392	bc			0.1231 ± 0.00314	b
6 years			33.5 ± 3.83	c			3.36 ± 0.17	c			0.957 ± 0.58	a			6.91 ± 0.16	bc			5.25 ± 0.162	c			4.78 ± 0.304	b			4.33 ± 0.334	bc			0.235 ± 0.034	ab			0.0618 ± 0.00517	ab			0.0704 ± 0.00716	b			0.1071 ± 0.00392	bc			0.1265 ± 0.00314	b
8 years			37.5 ± 4.28	d			3.44 ± 0.17	c			0.952 ± 0.58	a			6.9 ± 0.16	bc			5.1 ± 0.162	bc			4.66 ± 0.304	b			4.09 ± 0.334	ab			0.237 ± 0.034	a			0.0622 ± 0.00517	ab			0.0684 ± 0.00716	b			0.1118 ± 0.00392	c			0.1293 ± 0.00314	b
Random effect
road section	0.03618				0.08158				8.156e-05				0.07195				0.07003				0.26575				0.3133				0.003254				6.522e-05				0.0001351				3.391e-05				5.113e-06				0.0005018
plot:road section	0.0321				0.03227				4.136e-05				0.01569				0.08764				0.07296				0.1294				5.301e-05				6.919e-05				0.0001482				4.694e-05				0				0
residuals					0.08887				0.0003428				0.08262				0.0919				0.14894				0.2967				0.002475				0.000231				0.0002265				0.0001983				0.000488				0.0006618
R² conditional	0.875				0.765				0.365				0.659				0.65				0.71				0.626				0.608				0.398				0.593				0.364
R² marginal	0.625				0.465				0.138				0.297				0.051				0.051				0.069				0.084				0.048				0.085				0.104				0.381				0.245
[truncated: 15 more columns]
