# Supplementary material for: Temporal shifts in ground vegetation characteristics on newly constructed forest road verges
Source: Research Square preprint supplement (doi:10.21203/rs.3.rs-8555061/v1), 2026-02-01
Supplement: Supplementary file 2 [file dda434f2f04d5bc3e8098a54.docx]

***Temporal shifts in ground vegetation characteristics on newly constructed forest road verges***

*journal: Folia Geobotanica*

*Līga Pentjuša, Linda Gerra-Inohosa, Ilze Matisone, Zane Lībiete*

*L. Pentjusa*, L. Gerra-Inohosa, I. Matisone, Z. Lībiete*

*Latvian State Forest Research Institute “Silava”, Rigas street 111, Salaspils 2169, Latvia*

**e-mail:* [*liga.pentjusa@silava.lv*](mailto:liga.pentjusa@silava.lv)

**Appendix I.** Occurrence (%) of all recorded taxa of herbaceous plants, bryophytes, and lichens at each assessment year (road age).

|  | **Occurence, %** | | | | | |
| --- | --- | --- | --- | --- | --- | --- |
| **Species** | 1 year | 2 years | 3 years | 4 years | 6 years | 8 years |
| *Acer platanoides* L. | 0 | 1.7 | 0 | 0 | 0 | 0 |
| *Achillea millefolium* L. | 15 | 21.7 | 31.7 | 28.3 | 46.7 | 45 |
| *Acorus calamus* L. | 0 | 0 | 0 | 0 | 1.7 | 0 |
| *Aegopodium podagraria* L. | 8.3 | 8.3 | 11.7 | 10 | 18.3 | 13.3 |
| *Agrostis capillaris* L. | 8.3 | 76.7 | 75 | 81.7 | 83.3 | 83.3 |
| *Agrostis stolonifera* L. | 0 | 28.3 | 26.7 | 13.3 | 15 | 3.3 |
| *Alchemilla vulgaris* L. | 0 | 0 | 0 | 3.3 | 3.3 | 3.3 |
| *Alisma plantago-aquatica* L. | 0 | 3.3 | 5 | 0 | 0 | 0 |
| *Alnus glutinosa* (L.) Gaertn. | 0 | 0 | 3.3 | 15 | 16.7 | 26.7 |
| *Alnus incana* (L.) Moench | 0 | 1.7 | 3.3 | 0 | 0 | 0 |
| *Alopecurus aequalis* Sobol. | 0 | 11.7 | 0 | 0 | 0 | 0 |
| *Angelica sylvestris* L. | 3.3 | 5 | 1.7 | 5 | 6.7 | 5 |
| *Anthoxanthum odoratum* L. | 0 | 1.7 | 0 | 0 | 0 | 3.3 |
| *Anthriscus sylvestris* (L.) Hoffm. | 1.7 | 3.3 | 5 | 6.7 | 1.7 | 3.3 |
| *Anthyllis arenaria* (Rupr.) Juz. | 0 | 0 | 0 | 1.7 | 0 | 1.7 |
| *Arenaria serpyllifolia* L. | 0 | 18.3 | 11.7 | 26.7 | 3.3 | 6.7 |
| *Armoracia rusticana* G. Gaertn. *et al.* | 1.7 | 1.7 | 1.7 | 1.7 | 1.7 | 1.7 |
| *Artemisia vulgaris* L. | 18.3 | 36.7 | 45 | 48.3 | 58.3 | 60 |
| *Athyrium filix-femina* (L.) Roth | 5 | 6.7 | 0 | 8.3 | 8.3 | 10 |
| *Betula pendula* Roth | 1.7 | 46.7 | 55 | 71.7 | 70 | 45 |
| *Betula pubescens* Ehrh. | 1.7 | 8.3 | 8.3 | 1.7 | 5 | 0 |
| *Betula spp.* L*.* | 0 | 0 | 0 | 0 | 6.7 | 41.7 |
| *Bidens tripartita* L. | 0 | 8.3 | 0 | 1.7 | 1.7 | 0 |
| *Bromus arvensis L.* | 0 | 0 | 1.7 | 1.7 | 0 | 0 |
| *Bromus hordeaceus* L. | 0 | 0 | 0 | 1.7 | 1.7 | 5 |
| *Bromus inermis* Leyss. | 0 | 3.3 | 0 | 0 | 0 | 0 |
| *Bromus spp. L.* | 0 | 0 | 0 | 3.3 | 1.7 | 3.3 |
| *Calamagrostis arundinacea* (L.) Roth | 8.3 | 23.3 | 23.3 | 18.3 | 21.7 | 10 |
| *Calamagrostis canescens* (Weber) Roth | 5 | 3.3 | 8.3 | 18.3 | 11.7 | 1.7 |
| *Calamagrostis epigejos* (L.) Roth | 5 | 20 | 30 | 80 | 83.3 | 88.3 |
| *Calluna vulgaris* (L.) Hull | 5 | 25 | 56.7 | 68.3 | 68.3 | 73.3 |
| *Caltha palustris* L. | 1.7 | 0 | 0 | 0 | 0 | 0 |
| *Campanula patula* L. | 0 | 5 | 0 | 13.3 | 11.7 | 11.7 |
| *Campanula rotundifolia* L. | 0 | 0 | 1.7 | 0 | 1.7 | 0 |
| *Campanula spp.* L. | 0 | 1.7 | 5 | 1.7 | 0 | 0 |
| *Capsella bursa-pastoris* (L.) Medik. | 13.3 | 6.7 | 0 | 0 | 0 | 1.7 |
| *Cardamine pratensis* L. | 0 | 1.7 | 0 | 0 | 0 | 0 |
| *Cardamine spp.* L. | 0 | 13.3 | 5 | 5 | 0 | 0 |
| *Carduus crispus* L. | 0 | 0 | 0 | 0 | 0 | 1.7 |
| *Carex arenaria* L. | 0 | 5 | 1.7 | 0 | 0 | 0 |
| *Carex canescens* L. | 3.3 | 16.7 | 23.3 | 21.7 | 10 | 0 |
| *Carex digitata* L. | 0 | 0 | 1.7 | 3.3 | 1.7 | 8.3 |
| *Carex echinata* Murray | 0 | 0 | 3.3 | 5 | 3.3 | 3.3 |
| *Carex elongata* L. | 0 | 11.7 | 1.7 | 1.7 | 1.7 | 0 |
| *Carex ericetorum* Pollich | 0 | 3.3 | 0 | 0 | 0 | 0 |
| *Carex flacca* Schreb. | 0 | 1.7 | 0 | 0 | 0 | 0 |
| *Carex flava* L. | 0 | 0 | 1.7 | 3.3 | 3.3 | 1.7 |
| *Carex globularis* L. | 0 | 0 | 6.7 | 6.7 | 3.3 | 0 |
| *Carex hirta* L. | 0 | 1.7 | 3.3 | 8.3 | 5 | 5 |
| *Carex leporina* L. | 0 | 15 | 5 | 25 | 30 | 18.3 |
| *Carex nigra* (L.) Reichard | 0 | 5 | 6.7 | 13.3 | 11.7 | 6.7 |
| *Carex pallescens* L. | 0 | 0 | 0 | 6.7 | 8.3 | 5 |
| *Carex pilulifera* L. | 0 | 0 | 3.3 | 5 | 0 | 0 |
| *Carex pseudocyperus* L. | 0 | 6.7 | 3.3 | 8.3 | 6.7 | 1.7 |
| *Carex remota* L. | 0 | 0 | 0 | 1.7 | 0 | 0 |
| *Carex rostrata* Stokes | 0 | 0 | 0 | 1.7 | 1.7 | 0 |
| *Carex spp.* L. | 1.7 | 10 | 21.7 | 20 | 20 | 23.3 |
| *Carex vesicaria* L. | 0 | 0 | 3.3 | 1.7 | 5 | 0 |
| *Carlina vulgaris* L. | 0 | 0 | 0 | 0 | 0 | 1.7 |
| *Centaurea jacea* L. | 0 | 0 | 0 | 0 | 1.7 | 3.3 |
| *Centaurea phrygia* L. | 1.7 | 0 | 0 | 0 | 0 | 0 |
| *Centaurea scabiosa* L. | 0 | 1.7 | 1.7 | 3.3 | 1.7 | 0 |
| *Cerastium arvense* L. | 3.3 | 41.7 | 28.3 | 15 | 15 | 1.7 |
| *Cerastium holosteoides* Fr. | 0 | 1.7 | 0 | 31.7 | 26.7 | 25 |
| *Cerastium sp.* L. | 0 | 0 | 0 | 1.7 | 0 | 0 |
| *Chaenorhinum minus* (L.) Lange | 0 | 0 | 0 | 0 | 11.7 | 3.3 |
| *Chamaenerion angustifolium* (L.) Scop. | 8.3 | 25 | 40 | 48.3 | 43.3 | 50 |
| *Chenopodium album* L. | 16.7 | 18.3 | 0 | 1.7 | 0 | 6.7 |
| *Chenopodium sp.* L. | 0 | 0 | 0 | 0 | 0 | 1.7 |
| *Chrysosplenium alternifolium* L. | 3.3 | 1.7 | 0 | 1.7 | 0 | 0 |
| *Cicuta virosa* L. | 0 | 0 | 1.7 | 0 | 1.7 | 1.7 |
| *Circaea alpina* L. | 1.7 | 0 | 0 | 0 | 0 | 0 |
| *Cirsium arvense* (L.) Scop. | 3.3 | 13.3 | 11.7 | 18.3 | 11.7 | 21.7 |
| *Cirsium oleraceum* (L.) Scop. | 0 | 0 | 0 | 8.3 | 10 | 6.7 |
| *Cirsium palustre* (L.)Scop. | 0 | 0 | 3.3 | 16.7 | 10 | 10 |
| *Cirsium spp.* Mill. | 0 | 1.7 | 5 | 0 | 3.3 | 6.7 |
| *Cirsium vulgare* (Savi) Ten. | 0 | 1.7 | 0 | 1.7 | 6.7 | 16.7 |
| *Clinopodium acinos* (L.) Kuntze | 0 | 0 | 0 | 0 | 0 | 3.3 |
| *Clinopodium vulgare* L. | 0 | 6.7 | 6.7 | 6.7 | 0 | 0 |
| *Comarum palustre* L. | 0 | 0 | 0 | 0 | 0 | 1.7 |
| *Convallaria majalis* L. | 6.7 | 0 | 0 | 0 | 3.3 | 5 |
| *Convolvulus arvensis* L. | 20 | 3.3 | 10 | 11.7 | 1.7 | 6.7 |
| *Convolvulus spp.* L. | 0 | 0 | 0 | 0 | 0 | 1.7 |
| *Crepis biennis* L*.* | 0 | 0 | 0 | 0 | 0 | 1.7 |
| *Crepis spp.* L. | 0 | 0 | 0 | 8.3 | 8.3 | 0 |
| *Dactylis glomerata* L*.* | 1.7 | 0 | 0 | 5 | 8.3 | 1.7 |
| *Dactylorhiza maculata* (L.) Soó | 0 | 0 | 0 | 1.7 | 0 | 0 |
| *Daucus carota* L. | 0 | 0 | 0 | 1.7 | 3.3 | 3.3 |
| *Deschampsia cespitosa* (L.) P. Beauv. | 5 | 5 | 3.3 | 5 | 5 | 6.7 |
| *Dryopteris carthusiana* (Vill.) H. P. Fuchs | 11.7 | 11.7 | 3.3 | 6.7 | 3.3 | 6.7 |
| *Dryopteris expansa* (C. Presl) Fraser-Jenk. *et* Jermy | 3.3 | 0 | 0 | 0 | 0 | 0 |
| *Dryopteris filix-mas* (L.) Schott | 0 | 0 | 5 | 0 | 0 | 0 |
| *Elymus caninus* (L.) L. | 0 | 11.7 | 3.3 | 1.7 | 1.7 | 0 |
| *Elytrigia repens* (L.) Nevski | 10 | 61.7 | 63.3 | 40 | 20 | 10 |
| *Epilobium hirsutum* L. | 1.7 | 1.7 | 0 | 0 | 0 | 8.3 |
| *Epilobium montanum* L. | 0 | 11.7 | 0 | 0 | 0 | 6.7 |
| *Epilobium roseum* (Schreb.) Schreb. | 0 | 5 | 0 | 0 | 0 | 0 |
| *Epilobium spp.* L. | 0 | 21.7 | 6.7 | 26.7 | 13.3 | 21.7 |
| *Equisetum arvense* L. | 5 | 11.7 | 5 | 10 | 6.7 | 13.3 |
| *Equisetum pratense* Ehrh. | 0 | 0 | 0 | 0 | 1.7 | 0 |
| *Equisetum sylvaticum* L. | 3.3 | 3.3 | 3.3 | 5 | 3.3 | 3.3 |
| *Equisetum variegatum* Schleich. *ex* F. Weber *et* D. Mohr. | 0 | 0 | 0 | 0 | 1.7 | 0 |
| *Erigeron acris* L. | 0 | 0 | 0 | 0 | 5 | 6.7 |
| *Erigeron annuus* (L.) Desf | 0 | 0 | 8.3 | 5 | 15 | 25 |
| *Erigeron canadensis* L. | 1.7 | 35 | 80 | 83.3 | 78.3 | 70 |
| *Erysimum cheiranthoides* L. | 16.7 | 0 | 0 | 0 | 0 | 0 |
| *Euonymus europaeus* L. | 1.7 | 1.7 | 0 | 0 | 0 | 0 |
| *Euphrasia micrantha* Rchb. | 0 | 0 | 0 | 0 | 0 | 1.7 |
| *Fagopyrum esculentum* Moench | 0 | 11.7 | 3.3 | 1.7 | 0 | 0 |
| *Fallopia* *convolvulus* (L.) Á. Löve | 0 | 0 | 0 | 0 | 0 | 3.3 |
| *Festuca ovina* L. | 0 | 23.3 | 5 | 15 | 16.7 | 70 |
| *Festuca rubra* L. | 0 | 88.3 | 85 | 100 | 91.7 | 80 |
| *Filipendula ulmaria* (L.) Maxim. | 3.3 | 3.3 | 0 | 3.3 | 1.7 | 5 |
| *Fragaria vesca* L. | 0 | 1.7 | 1.7 | 8.3 | 6.7 | 6.7 |
| *Frangula alnus* Mill. | 3.3 | 15 | 3.3 | 3.3 | 10 | 16.7 |
| *Galeopsis spp.* L. | 28.3 | 3.3 | 6.7 | 13.3 | 5 | 5 |
| *Galeopsis tetrahit* L. | 0 | 0 | 0 | 0 | 0 | 5 |
| *Galium album* Mill. | 3.3 | 8.3 | 11.7 | 18.3 | 18.3 | 23.3 |
| *Galium aparine* L. | 0 | 0 | 1.7 | 0 | 1.7 | 0 |
| *Galium boreale* L. | 0 | 0 | 0 | 1.7 | 0 | 3.3 |
| *Galium elongatum* C. Presl. | 0 | 0 | 0 | 6.7 | 6.7 | 1.7 |
| *Galium palustre* L. | 0 | 3.3 | 3.3 | 1.7 | 1.7 | 5 |
| *Galium spp.* L. | 3.3 | 0 | 6.7 | 1.7 | 0 | 0 |
| *Galium uliginosum* L. | 1.7 | 0 | 5 | 0 | 0 | 8.3 |
| *Geranium pratense* L. | 0 | 0 | 0 | 0 | 0 | 1.7 |
| *Geranium spp.* L. | 0 | 0 | 0 | 1.7 | 1.7 | 0 |
| *Geranium sylvaticum* L. | 1.7 | 1.7 | 0 | 0 | 0 | 0 |
| *Geum rivale* L. | 0 | 0 | 0 | 1.7 | 3.3 | 1.7 |
| *Glechoma hederacea* L. | 3.3 | 0 | 0 | 0 | 0 | 0 |
| *Glyceria fluitans* (L.) R. Br. | 0 | 6.7 | 0 | 1.7 | 1.7 | 0 |
| *Gnaphalium uliginosum* L. | 6.7 | 16.7 | 0 | 13.3 | 13.3 | 8.3 |
| *Goodyera repens* (L.) R. Br. | 1.7 | 0 | 0 | 0 | 0 | 1.7 |
| *Gymnocarpium spp.* Newman | 0 | 1.7 | 0 | 0 | 0 | 0 |
| *Hieracium spp.* L. | 0 | 6.7 | 5 | 11.7 | 23.3 | 0 |
| *Hieracium umbellatum* L. | 0 | 0 | 0 | 0 | 0 | 3.3 |
| *Holcus lanatus* L. | 0 | 0 | 1.7 | 1.7 | 0 | 0 |
| *Hypericum maculatum* Crantz | 3.3 | 1.7 | 3.3 | 15 | 10 | 18.3 |
| *Hypericum perforatum* L. | 0 | 6.7 | 11.7 | 15 | 20 | 26.7 |
| *Hypericum spp.* L. | 0 | 3.3 | 0 | 0 | 1.7 | 0 |
| *Hypochaeris radicata* L. | 0 | 0 | 0 | 5 | 10 | 71.7 |
| *Impatiens parviflora* DC. | 5 | 0 | 0 | 0 | 0 | 0 |
| *Iris pseudacorus* L. | 1.7 | 0 | 0 | 1.7 | 0 | 1.7 |
| Jacobaea vulgaris Gaertn. | 0 | 0 | 0 | 0 | 0 | 1.7 |
| *Jasione montana* L. | 0 | 5 | 8.3 | 15 | 13.3 | 13.3 |
| *Juncus articulatus* L. | 0 | 11.7 | 1.7 | 6.7 | 6.7 | 1.7 |
| *Juncus bufonius* L. | 11.7 | 0 | 0 | 0 | 0 | 0 |
| *Juncus bulbosus* L*.* | 0 | 1.7 | 0 | 0 | 0 | 0 |
| *Juncus conglomeratus* L. | 0 | 0 | 1.7 | 0 | 0 | 3.3 |
| *Juncus effusus* L*.* | 0 | 31.7 | 40 | 66.7 | 66.7 | 65 |
| *Juncus filiformis* L. | 3.3 | 0 | 1.7 | 5 | 8.3 | 3.3 |
| *Juncus tenuis* Willd. | 0 | 1.7 | 0 | 1.7 | 1.7 | 1.7 |
| *Juniperus communis* L. | 0 | 0 | 0 | 0 | 1.7 | 0 |
| *Knautia arvensis* (L.) Coult. | 0 | 6.7 | 6.7 | 10 | 15 | 11.7 |
| *Koeleria glauca* (Spreng.) DC. | 0 | 0 | 1.7 | 0 | 0 | 0 |
| Lactuca muralis (L.) Gaertn. | 1.7 | 10 | 11.7 | 20 | 11.7 | 21.7 |
| *Lamium spp.* L. | 3.3 | 3.3 | 0 | 1.7 | 1.7 | 0 |
| *Lathyrus pratensis* L. | 1.7 | 5 | 0 | 5 | 13.3 | 10 |
| *Lathyrus sylvestris* L. | 0 | 0 | 8.3 | 3.3 | 0 | 0 |
| *Leontodon hispidus* L. | 0 | 1.7 | 3.3 | 5 | 3.3 | 0 |
| *Leucanthemum vulgare* Lam. | 0 | 13.3 | 25 | 20 | 20 | 21.7 |
| *Lolium giganteum* (L.) Darbysh. | 0 | 0 | 0 | 0 | 1.7 | 3.3 |
| *Lolium multiflorum* Lam. | 0 | 38.3 | 6.7 | 1.7 | 0 | 10 |
| *Lolium perenne* L. | 0 | 0 | 53.3 | 85 | 71.7 | 38.3 |
| Lolium pratense (Huds.) Darbysh. | 0 | 0 | 21.7 | 3.3 | 8.3 | 20 |
| *Lolium spp.* L. | 30 | 0 | 0 | 0 | 0 | 0 |
| *Lotus corniculatus* L. | 0 | 0 | 0 | 0 | 0 | 1.7 |
| *Lupinus polyphyllus* Lindl. | 11.7 | 25 | 26.7 | 30 | 30 | 33.3 |
| *Luzula multiflora* (Ehrh.) Lej. | 0 | 0 | 18.3 | 35 | 18.3 | 16.7 |
| *Luzula pilosa* (L.) Willd. | 18.3 | 53.3 | 18.3 | 46.7 | 38.3 | 46.7 |
| *Lycopodium annotinum* L. | 0 | 1.7 | 0 | 0 | 0 | 0 |
| *Lycopus europaeus* L. | 0 | 5 | 3.3 | 10 | 10 | 10 |
| *Lysimachia nummularia* L. | 1.7 | 0 | 0 | 0 | 0 | 0 |
| *Lysimachia thyrsiflora* L. | 1.7 | 0 | 0 | 1.7 | 0 | 0 |
| *Lysimachia vulgaris* L. | 5 | 18.3 | 15 | 21.7 | 23.3 | 28.3 |
| *Maianthemum bifolium* (L.) F. W. Schmidt | 10 | 11.7 | 5 | 5 | 3.3 | 5 |
| *Matricaria discoidea* DC. | 10 | 30 | 6.7 | 1.7 | 0 | 3.3 |
| *Medicago falcata* L. | 0 | 0 | 0 | 0 | 1.7 | 0 |
| *Medicago lupulina* L. | 0 | 1.7 | 23.3 | 45 | 51.7 | 45 |
| *Medicago sativa* L. | 0 | 0 | 8.3 | 3.3 | 3.3 | 0 |
| *Melampyrum nemorosum* L. | 0 | 8.3 | 5 | 3.3 | 5 | 6.7 |
| *Melampyrum pratense* L. | 18.3 | 16.7 | 1.7 | 13.3 | 20 | 28.3 |
| *Melilotus albus* Medik. | 0 | 8.3 | 3.3 | 0 | 5 | 0 |
| *Melilotus officinalis* (L.) Lam. | 6.7 | 0 | 0 | 0 | 0 | 0 |
| *Mentha arvensis* L. | 3.3 | 10 | 3.3 | 3.3 | 5 | 3.3 |
| *Milium effusum* L. | 3.3 | 3.3 | 0 | 0 | 0 | 0 |
| *Moehringia trinervia* (L.) Clairv. | 8.3 | 5 | 3.3 | 6.7 | 1.7 | 8.3 |
| *Molinia caerulea* (L.) Moench | 11.7 | 18.3 | 10 | 25 | 23.3 | 28.3 |
| *Myosotis arvensis* (L.) Hill*.* | 0 | 3.3 | 0 | 1.7 | 1.7 | 1.7 |
| *Myosotis scorpioides* L. | 0 | 3.3 | 1.7 | 1.7 | 0 | 5 |
| *Oenothera biennis* L. | 0 | 1.7 | 1.7 | 1.7 | 3.3 | 6.7 |
| *Orthilia secunda* (L.) House | 0 | 0 | 0 | 0 | 0 | 1.7 |
| *Oxalis acetosella* L. | 16.7 | 15 | 6.7 | 6.7 | 26.7 | 20 |
| *Persicaria amphibia* (L.) Delarbre | 0 | 0 | 0 | 0 | 0 | 5 |
| *Persicaria hydropiper* (L.) Delarbre | 3.3 | 33.3 | 6.7 | 0 | 0 | 6.7 |
| *Persicaria lapathifolia* (L.) Delarbre | 0 | 0 | 3.3 | 1.7 | 0 | 0 |
| *Persicaria maculosa* Gray | 26.7 | 25 | 20 | 15 | 5 | 0 |
| *Peucedanum palustre* (L.) Moench | 0 | 3.3 | 0 | 1.7 | 1.7 | 0 |
| *Phalaris arundinacea* L. | 0 | 0 | 0 | 1.7 | 0 | 0 |
| *Phleum pratense* L. | 0 | 18.3 | 26.7 | 50 | 36.7 | 30 |
| *Phragmites australis* (Cav.) Trin. *ex* Steud. | 0 | 1.7 | 0 | 0 | 0 | 0 |
| *Picea abies* (L.) H. Karst | 10 | 81.7 | 86.7 | 90 | 85 | 85 |
| *Pilosella officinarum* Vaill. | 0 | 1.7 | 0 | 3.3 | 5 | 8.3 |
| *Pilosella piloselloides* subsp. *praealta* (Gochnat) S. Bräut. et Greuter | 0 | 0 | 0 | 0 | 0 | 13.3 |
| *Pilosella spp.* Hill | 0 | 0 | 0 | 0 | 0 | 5 |
| *Pimpinella major* (L.) Huds. | 0 | 1.7 | 0 | 0 | 0 | 0 |
| *Pimpinella saxifraga* L. | 0 | 0 | 0 | 1.7 | 0 | 6.7 |
| *Pinus sylvestris* L. | 1.7 | 35 | 66.7 | 71.7 | 76.7 | 78.3 |
| *Plantago lanceolata* L. | 0 | 0 | 0 | 0 | 0 | 1.7 |
| *Plantago major* L. | 10 | 35 | 43.3 | 41.7 | 38.3 | 48.3 |
| *Poa angustifolia* L. | 0 | 0 | 0 | 0 | 0 | 5 |
| *Poa annua* L. | 11.7 | 61.7 | 26.7 | 21.7 | 13.3 | 3.3 |
| *Poa compressa* L. | 0 | 3.3 | 0 | 0 | 0 | 0 |
| *Poa nemoralis* L. | 0 | 11.7 | 0 | 0 | 0 | 0 |
| *Poa palustris* L. | 0 | 3.3 | 5 | 6.7 | 6.7 | 3.3 |
| *Poa pratensis* L. | 1.7 | 5 | 8.3 | 16.7 | 10 | 5 |
| *Poa spp.* L. | 1.7 | 0 | 0 | 0 | 1.7 | 6.7 |
| *Polygala amarella* Crantz | 0 | 0 | 0 | 0 | 0 | 1.7 |
| *Polygonatum spp.* Mill. | 0 | 0 | 0 | 0 | 0 | 3.3 |
| *Polygonum arenastrum* Boreau | 15 | 11.7 | 1.7 | 0 | 0 | 3.3 |
| *Populus tremula* L. | 3.3 | 6.7 | 3.3 | 21.7 | 16.7 | 30 |
| *Potentilla erecta* (L.) Raeusch. | 1.7 | 18.3 | 16.7 | 28.3 | 18.3 | 21.7 |
| *Potentilla incana* P. Gaertn . B. Mey. et Scherb. | 0 | 1.7 | 0 | 1.7 | 1.7 | 0 |
| *Potentilla* *intermedia* L. | 0 | 0 | 1.7 | 1.7 | 0 | 0 |
| *Prunella* *vulgaris* L. | 0 | 15 | 21.7 | 21.7 | 16.7 | 20 |
| *Pteridium* *aquilinum* (L.) Kuhn | 35 | 20 | 13.3 | 18.3 | 21.7 | 20 |
| *Quercus* *robur* L. | 0 | 0 | 1.7 | 1.7 | 1.7 | 1.7 |
| *Ranunculus* *acris* L. | 3.3 | 3.3 | 0 | 15 | 11.7 | 13.3 |
| *Ranunculus* *aquatilis* L. | 0 | 0 | 0 | 0 | 1.7 | 0 |
| *Ranunculus* *flammula* L. | 0 | 0 | 0 | 0 | 1.7 | 0 |
| *Ranunculus* *lanuginosus* L. | 1.7 | 0 | 0 | 0 | 0 | 0 |
| *Ranunculus* *lingua* L. | 0 | 1.7 | 0 | 0 | 0 | 0 |
| *Ranunculus* *polyanthemos* L. | 0 | 0 | 0 | 0 | 0 | 5 |
| *Ranunculus* *repens* L. | 3.3 | 23.3 | 15 | 23.3 | 18.3 | 21.7 |
| *Rorippa* *palustris* (L.) Besser | 0 | 3.3 | 0 | 0 | 0 | 0 |
| *Rorippa* *sp*. Scop. | 0 | 0 | 0 | 1.7 | 0 | 0 |
| *Rorippa* *sylvestris* (L.) Besser | 0 | 0 | 1.7 | 0 | 0 | 0 |
| *Rubus* *caesius* L. | 5 | 0 | 0 | 0 | 6.7 | 1.7 |
| *Rubus* *idaeus* L. | 21.7 | 66.7 | 75 | 83.3 | 73.3 | 75 |
| *Rubus* *nessensis* Hall | 0 | 0 | 0 | 0 | 1.7 | 6.7 |
| *Rubus* *saxatilis* L. | 3.3 | 3.3 | 1.7 | 6.7 | 0 | 1.7 |
| *Rumex* *acetosa* L. | 0 | 11.7 | 0 | 0 | 1.7 | 1.7 |
| *Rumex* *acetosella* L. | 48.3 | 58.3 | 16.7 | 23.3 | 30 | 43.3 |
| *Rumex* *obtusifolius* L. | 0 | 0 | 0 | 1.7 | 0 | 0 |
| *Sagina* *nodosa* (L.) Fenzl | 0 | 3.3 | 0 | 0 | 0 | 0 |
| *Sagina* *procumbens* L. | 45 | 21.7 | 6.7 | 3.3 | 0 | 0 |
| *Salix* *spp*. L. | 3.3 | 18.3 | 61.7 | 68.3 | 71.7 | 76.7 |
| *Saponaria* *officinalis* L. | 0 | 0 | 0 | 1.7 | 0 | 0 |
| *Scirpus* *sylvaticus* L. | 1.7 | 1.7 | 1.7 | 6.7 | 5 | 5 |
| *Scleranthus* *annuus* L. | 5 | 45 | 21.7 | 30 | 6.7 | 15 |
| *Scorzoneroides* *autumnalis* (L.) Moench | 0 | 0 | 0 | 0 | 18.3 | 16.7 |
| *Scrophularia* *nodosa* L. | 1.7 | 1.7 | 0 | 1.7 | 0 | 1.7 |
| *Scutellaria* *galericulata* L. | 1.7 | 5 | 1.7 | 3.3 | 3.3 | 1.7 |
| *Senecio* *spp*. L. | 0 | 3.3 | 0 | 5 | 1.7 | 5 |
| *Senecio* *sylvaticus* L. | 0 | 0 | 11.7 | 25 | 3.3 | 5 |
| *Senecio* *viscosus* L. | 0 | 15 | 1.7 | 0 | 0 | 0 |
| *Senecio* *vulgaris* L. | 1.7 | 5 | 0 | 1.7 | 0 | 0 |
| *Setaria* *pumila* (Poir.) Roem. et Schult | 0 | 3.3 | 1.7 | 0 | 0 | 0 |
| *Setaria* *viridis* (L.) P. Beauv. | 0 | 0 | 0 | 0 | 0 | 18.3 |
| *Silene* *flos*-*cuculi* (L.) Greuter et Burdet. | 1.7 | 5 | 3.3 | 6.7 | 3.3 | 8.3 |
| *Silene* *latifolia* Poir. | 0 | 5 | 0 | 0 | 0 | 0 |
| *Silene* *vulgaris* (Moench) Garcke. | 0 | 0 | 0 | 0 | 1.7 | 1.7 |
| *Solanum* *dulcamara* L. | 0 | 5 | 6.7 | 5 | 1.7 | 3.3 |
| *Solidago* *canadensis* L. | 0 | 3.3 | 1.7 | 1.7 | 6.7 | 6.7 |
| *Solidago* *virgaurea* L. | 8.3 | 8.3 | 8.3 | 18.3 | 10 | 26.7 |
| *Sonchus* *arvensis* L. | 6.7 | 3.3 | 8.3 | 1.7 | 1.7 | 8.3 |
| *Sonchus* *oleraceus* L. | 0 | 10 | 10 | 16.7 | 5 | 1.7 |
| *Sonchus* *spp*. L. | 0 | 0 | 3.3 | 1.7 | 0 | 3.3 |
| *Sorbus* *aucuparia* L. | 1.7 | 5 | 3.3 | 3.3 | 8.3 | 10 |
| *Spergula* *arvensis* L. | 0 | 35 | 26.7 | 11.7 | 8.3 | 15 |
| *Spergularia* *rubra* (L.) J. Presl et C. Presl | 0 | 3.3 | 0 | 0 | 0 | 0 |
| *Stellaria* *aquatica* (L.) Scop. | 1.7 | 0 | 0 | 0 | 0 | 0 |
| *Stellaria* *graminea* L. | 0 | 6.7 | 10 | 20 | 30 | 15 |
| *Stellaria* *holostea* L. | 3.3 | 0 | 0 | 0 | 0 | 0 |
| *Stellaria* *longifolia* Muhl. ex Willd. | 0 | 1.7 | 0 | 0 | 1.7 | 13.3 |
| *Stellaria* *media* (L.) Vill. | 13.3 | 5 | 0 | 1.7 | 1.7 | 0 |
| *Stellaria* *nemorum* L. | 3.3 | 0 | 0 | 0 | 0 | 1.7 |
| *Stellaria* *palustris* (Murray ex Ehrh.) Hoffm. | 0 | 3.3 | 0 | 0 | 0 | 0 |
| *Symphytum* *officinale* L. | 0 | 0 | 0 | 0 | 1.7 | 0 |
| *Taraxacum* *spp*. F. H. Wigg. | 3.3 | 16.7 | 53.3 | 75 | 90 | 91.7 |
| *Thelypteris* *palustris* Schott. | 0 | 0 | 3.3 | 0 | 0 | 0 |
| *Thymus* *serpyllum* L. | 0 | 0 | 0 | 0 | 1.7 | 0 |
| *Trientalis* *europaea* L. | 10 | 11.7 | 5 | 3.3 | 3.3 | 6.7 |
| *Trifolium* *arvense* L. | 0 | 1.7 | 5 | 5 | 3.3 | 1.7 |
| *Trifolium* *campestre* Schreb. | 0 | 10 | 0 | 0 | 0 | 0 |
| *Trifolium* *hybridum* L. | 0 | 0 | 0 | 1.7 | 0 | 1.7 |
| *Trifolium* *medium* L. | 0 | 0 | 3.3 | 0 | 0 | 0 |
| *Trifolium* *pratense* L. | 0 | 10 | 21.7 | 21.7 | 10 | 10 |
| *Trifolium* *repens* L. | 8.3 | 35 | 25 | 23.3 | 33.3 | 28.3 |
| *Tripleurospermum* *inodorum* (L.) Sch. Bip | 0 | 1.7 | 0 | 0 | 0 | 1.7 |
| *Tussilago* *farfara* L. | 1.7 | 16.7 | 15 | 26.7 | 21.7 | 21.7 |
| *Typha* *latifolia* L. | 0 | 0 | 3.3 | 0 | 0 | 0 |
| *Typha* *sp*. L. | 0 | 3.3 | 0 | 0 | 0 | 0 |
| *Urtica* *dioica* L. | 6.7 | 16.7 | 5 | 11.7 | 15 | 13.3 |
| *Vaccinium* *myrtillus* L. | 41.7 | 43.3 | 26.7 | 31.7 | 33.3 | 38.3 |
| *Vaccinium* *vitis*-*idaea* L. | 21.7 | 13.3 | 5 | 8.3 | 11.7 | 20 |
| *Valeriana* *officinalis* L. | 0 | 1.7 | 0 | 5 | 60 | 10 |
| *Verbascum* *nigrum* L. | 0 | 1.7 | 1.7 | 11.7 | 10 | 8.3 |
| *Verbascum* *thapsus* L. | 0 | 0 | 0 | 0 | 0 | 1.7 |
| *Veronica* *chamaedrys* L. | 6.7 | 8.3 | 16.7 | 23.3 | 25 | 26.7 |
| *Veronica* *officinalis* L. | 0 | 31.7 | 30 | 55 | 6.7 | 43.3 |
| *Veronica* *scutellata* L. | 0 | 0 | 0 | 0 | 0 | 3.3 |
| *Veronica* *serpyllifolia* L. | 0 | 15 | 6.7 | 0 | 0 | 0 |
| *Veronica* *sp*. L. | 0 | 0 | 1.7 | 0 | 0 | 0 |
| *Vicia* *cracca* L. | 3.3 | 20 | 20 | 20 | 23.3 | 23.3 |
| *Vicia* *sp*. L. | 0 | 0 | 0 | 0 | 0 | 1.7 |
| *Vicia* *sylvatica* L. | 0 | 0 | 0 | 0 | 1.7 | 1.7 |
| *Viola* *arvensis* Murray | 10 | 0 | 1.7 | 3.3 | 0 | 3.3 |
| *Viola* *palustris* L. | 1.7 | 5 | 0 | 0 | 0 | 0 |
| *Viola* *spp*. L. | 1.7 | 5 | 6.7 | 25 | 31.7 | 30 |
| *Viola* *tricolor* L. | 0 | 1.7 | 0 | 0 | 0 | 0 |
| *Atrichum* *undulatum* (Hedw.) P. Beauv. | 0 | 8.3 | 11.7 | 20 | 15 | 6.7 |
| *Aulacomnium* *palustre* (Hedw.) Schwägr. | 1.7 | 1.7 | 1.7 | 20 | 36.7 | 38.3 |
| *Brachythecium* *albicans* (Hedw.) Schimp. | 0 | 0 | 0 | 0 | 0 | 13.3 |
| *Brachythecium* *rutabulum* (Hedw.) Schimp. | 5 | 8.3 | 5 | 16.7 | 13.3 | 30 |
| *Brachythecium* *spp*. Schimp. | 0 | 0 | 0 | 0 | 1.7 | 11.7 |
| *Bryum* *caespiticium* Hedw. | 0 | 0 | 0 | 0 | 0 | 1.7 |
| *Calliergon* *cordifolium* (Hedw.) Kindb. | 3.3 | 0 | 0 | 0 | 1.7 | 0 |
| *Calliergonella cuspidata* (Hedw.) Loeske | 0 | 0 | 0 | 0 | 10 | 15 |
| *Ceratodon purpureus* (Hedw.) Brid. | 0 | 0 | 25 | 63.3 | 73.3 | 73.3 |
| *Cirriphyllum piliferum* (Hedw.) Grout | 0 | 0 | 0 | 1.7 | 3.3 | 3.3 |
| *Cladonia arbuscula* (Wallr.) Flot. | 1.7 | 3.3 | 1.7 | 1.7 | 5 | 5 |
| *Cladonia coniocraea* (Flörke) Spreng. | 0 | 0 | 0 | 0 | 0 | 3.3 |
| *Cladonia gracilis* Willd. | 0 | 1.7 | 0 | 1.7 | 1.7 | 1.7 |
| *Cladonia rangiferina* (L.) F. H. Wigg. | 5 | 5 | 1.7 | 1.7 | 1.7 | 1.7 |
| *Cladonia spp.* P. Browne | 0 | 0 | 0 | 0 | 1.7 | 8.3 |
| *Cladonia stellaris* (Opiz) Pouzar & Vězda | 0 | 1.7 | 0 | 0 | 0 | 0 |
| *Climacium dendroides* (Hedw.) F. Weber & D. Mohr | 0 | 0 | 0 | 0 | 3.3 | 5 |
| *Dicranum polysetum* Sw. ex anon. | 38.3 | 35 | 6.7 | 38.3 | 35 | 36.7 |
| *Dicranum scoparium* Hedw. | 5 | 31.7 | 20 | 20 | 16.7 | 6.7 |
| *Eurhynchium angustirete* (Broth.) T. J. Kop. | 0 | 0 | 0 | 0 | 6.7 | 0 |
| *Funaria hygrometrica* Hedw. | 0 | 13.3 | 51.7 | 13.3 | 0 | 0 |
| *Hylocomium splendens* (Hedw.) Schimp. | 50 | 48.3 | 41.7 | 53.3 | 63.3 | 81.7 |
| *Marchantia polymorpha* L. | 0 | 0 | 21.7 | 30 | 31.7 | 30 |
| *Oxyrrhynchium hians* (Hedw.) Loeske | 0 | 0 | 0 | 0 | 1.7 | 0 |
| *Peltigera canina* (L.) Willd. | 0 | 0 | 0 | 1.7 | 5 | 1.7 |
| *Peltigera spp.* Willd. | 0 | 0 | 0 | 0 | 16.7 | 26.7 |
| *Plagiomnium affine* (Blandow ex Funck) T. J. Kop. | 3.3 | 6.7 | 0 | 15 | 15 | 31.7 |
| *Plagiomnium cuspidatum* (Hedw.) T. J. Kop. | 0 | 0 | 0 | 0 | 1.7 | 13.3 |
| *Plagiomnium ellipticum* (Brid.) T. J. Kop. | 1.7 | 0 | 0 | 0 | 0 | 0 |
| *Plagiomnium undulatum* (Hedw.) T. J. Kop. | 5 | 1.7 | 0 | 0 | 3.3 | 1.7 |
| *Plagiothecium* sp. Bruch & Schimp. | 0 | 1.7 | 0 | 0 | 0 | 0 |
| *Pleurozium schreberi* (Willd. ex Brid.) Mitt. | 55 | 65 | 46.7 | 60 | 65 | 76.7 |
| *Pogonatum urnigerum* (Hedw.) P. Beauv. | 0 | 0 | 0 | 0 | 31.7 | 21.7 |
| *Pohlia nutans* (Hedw.) Lindb. | 3.3 | 1.7 | 6.7 | 16.7 | 20 | 23.3 |
| *Polytrichastrum formosum* (Hedw.) G. L. Sm. | 0 | 0 | 0 | 23.3 | 15 | 5 |
| *Polytrichum commune* Hedw. | 0 | 18.3 | 6.7 | 38.3 | 31.7 | 40 |
| *Polytrichum juniperinum* Hedw. | 13.3 | 56.7 | 50 | 56.7 | 61.7 | 78.3 |
| *Polytrichum piliferum* Hedw. | 0 | 0 | 0 | 0 | 1.7 | 5 |
| *Ptilium crista-castrensis* (Hedw.) De Not. | 15 | 11.7 | 1.7 | 6.7 | 10 | 20 |
| *Rhodobryum roseum* (Hedw.) Limpr. | 5 | 0 | 0 | 0 | 3.3 | 3.3 |
| *Rhytidiadelphus squarrosus* (Hedw.) Warnst. | 1.7 | 0 | 0 | 5 | 23.3 | 23.3 |
| *Rhytidiadelphus triquetrus* (Hedw.) Warnst. | 0 | 1.7 | 1.7 | 5 | 6.7 | 16.7 |
| *Sphagnum angustifolium* (Russow) C.E.O.Jensen | 6.7 | 10 | 0 | 0 | 0 | 1.7 |
| *Sphagnum girgensohnii* Russow | 0 | 0 | 0 | 0 | 8.3 | 3.3 |
| *Sphagnum squarrosum* Crome | 1.7 | 0 | 0 | 0 | 0 | 0 |
