# Supplementary material for: Temporal shifts in ground vegetation characteristics on newly constructed forest road verges
Source: Research Square preprint supplement (doi:10.21203/rs.3.rs-8555061/v1), 2026-02-01
Supplement: Supplementary file 3 [file fa1ef35ffdaf6be5689f1f61.xlsx]

## Sheet: Sheet1
Temporal shifts in ground vegetation characteristics on newly constructed forest road verges, journal: Folia Geobotanica, Līga Pentjuša, Linda Gerra-Inohosa, Ilze Matisone, Zane Lībiete L. Pentjusa*, L. Gerra-Inohosa, I. Matisone, Z. Lībiete Latvian State Forest Research Institute “Silava”, Rigas street 111, Salaspils 2169, Latvia *e-mail: liga.pentjusa@silava.lv
Appendix III. Estimated marginal means (± SE) from linear mixed-effects models of RaoQ for Ellenberg indicator values (light, moisture, reaction, nutrients) and soil disturbance across road ages. Letters indicate significant pairwise differences among road ages within each indicator (Tukey-adjusted comparisons, p < 0.05).
Road age	Ellenberg L	Ellenberg M	Ellenberg R	Ellenberg N	Soil disturbance
1 year	0.0615 ± 0.0029 ab	0.0505 ± 0.0029 a	0.0931 ± 0.0029 c	0.0821 ± 0.0029 c	0.0652 ± 0.0029 b
2 years	0.0692 ± 0.0029 a	0.0691 ± 0.0029 a	0.1049 ± 0.0029 b	0.1338 ± 0.0029 c	0.1093 ± 0.0029 b
3 years	0.0553 ± 0.0029 a	0.0641 ± 0.0029 a	0.1031 ± 0.0029 c	0.1262 ± 0.0029 d	0.0900 ± 0.0029 b
4 years	0.0581 ± 0.0029 a	0.0687 ± 0.0029 ab	0.1061 ± 0.0029 c	0.1231 ± 0.0029 d	0.0792 ± 0.0029 b
6 years	0.0618 ± 0.0029 a	0.0704 ± 0.0029 a	0.1071 ± 0.0029 b	0.1265 ± 0.0029 c	0.0704 ± 0.0029 a
8 years	0.0622 ± 0.0029 a	0.0684 ± 0.0029 ab	0.1118 ± 0.0029 c	0.1293 ± 0.0029 d	0.0745 ± 0.0029 b
